# Supplementary material
Source: MDPI journal article supplement (https://www.mdpi.com/2073-4441/14/17/2614)
Supplement: s1 [file s1]

## Article

# Latitudinal and altitudinal gradients of riverine landscapes in Andean rivers

Evelyn Habit<sup>1,2\*</sup>, Alejandra Zurita<sup>1</sup>, Gustavo Díaz<sup>2</sup>, Aliro Manosalva<sup>2</sup>, Pedro Arriagada<sup>3</sup>, Oscar Link<sup>4</sup>, Konrad Górski<sup>5,6</sup>

**Supplementary Materials:** The following supporting information can be downloaded at: [www.mdpi.com/xxx/s1](http://www.mdpi.com/xxx/s1), Figure S1: a) Dominant geology, and b) Channel planform of the seven riverine FPZs (1=AHA; 2=ASDS; 3=SSC; 4=SMC; 5=SMR; 6=BGDS; 7=BIR) and lakes and reservoirs (8); Figure S2. Examples of high downstream river slope FPZs. a) AHA from the Mataquito River basin; b) ASDS from the Puelo River basin. Google Earth images year 2020; Figure S3. Examples of sinuous rivers FPZs. a) SSC from the Bueno River basin; b) SMC from the Toltén River basin; c) SMR from the Imperial River basin. Google Earth images year 2020; Figure S4. Examples of braided FPZs. a) BGDS from the Rapel River basin; b) BIR from the Maipo River basin. Google Earth images year 2020. Table S1: Number of river sections (NRS) clustered in 8 FPZs and average of each geomorphic variable used for the cluster analysis. Dominant geology and channel planform are shown in Figure S1. Mean elevation and mean annual precipitation by FPZ are included for descriptions. FPZ 8 represents lakes and reservoirs. (See Table 1 for abbreviations; RVS and LVS are replaced by VSmax: maximum valley slope and VSmin: minimum valley slope); Table S2. Pairwise comparisons among the seven riverine FPZs based on the geomorphic characteristics.

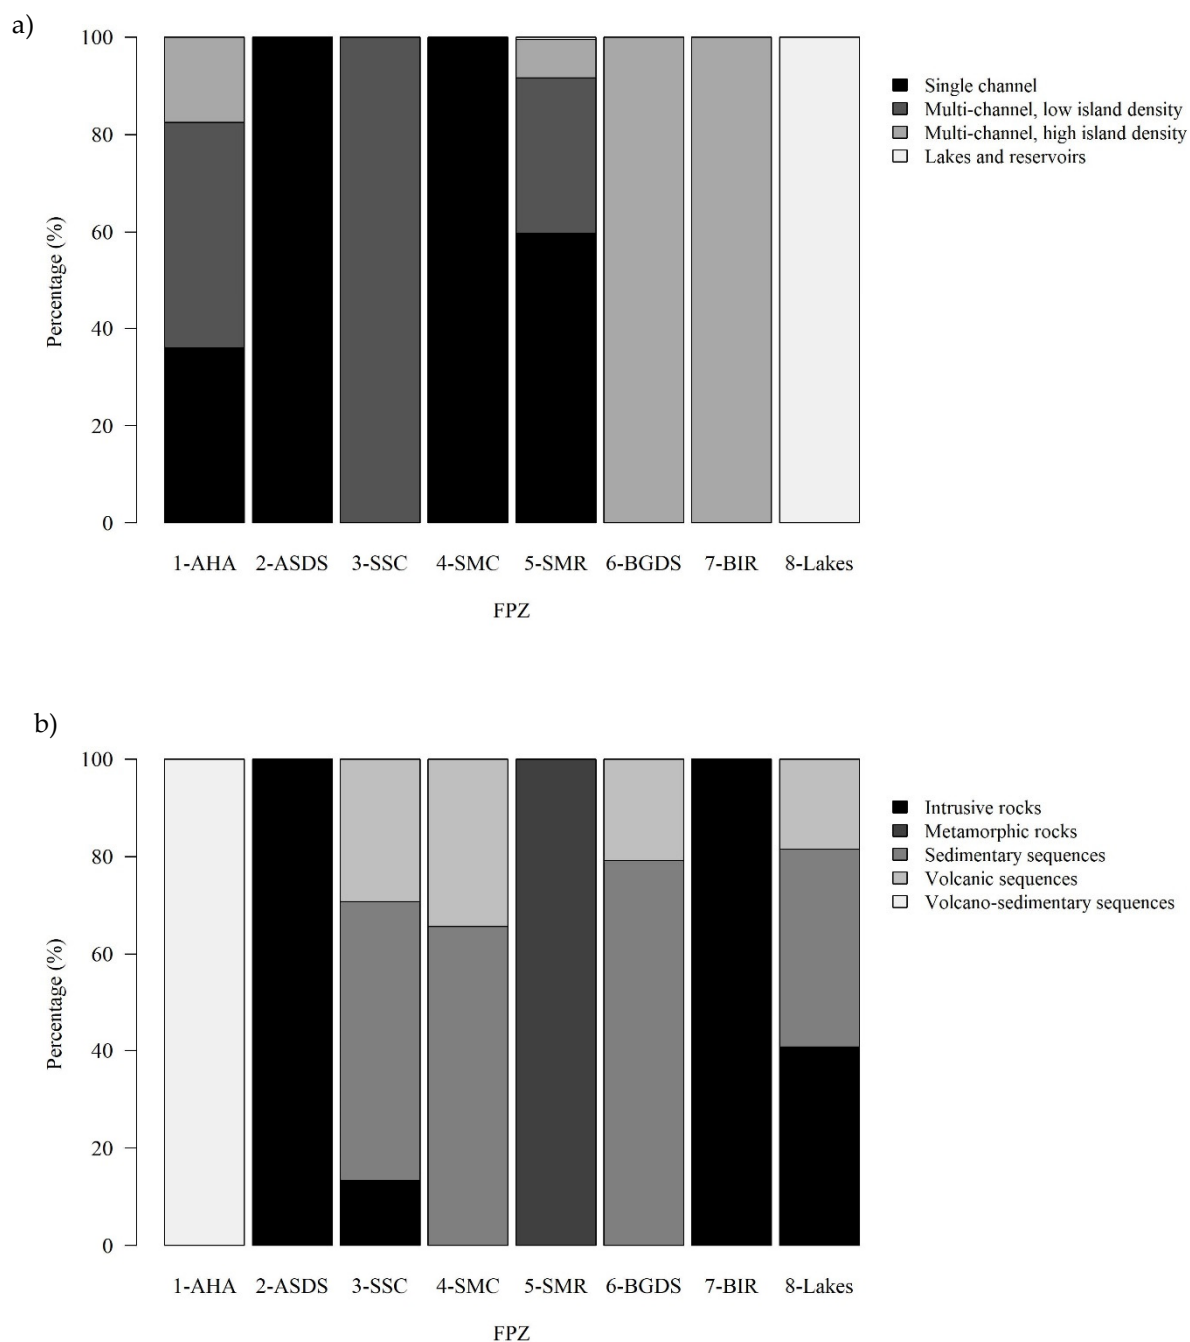

**Figure S1.** a) Dominant geology, and b) Channel planform of the seven riverine FPZs (1=AHA; 2=ASDS; 3=SSC; 4=SMC; 5=SMR; 6=BGDS; 7=BIR) and lakes and reservoirs (8).

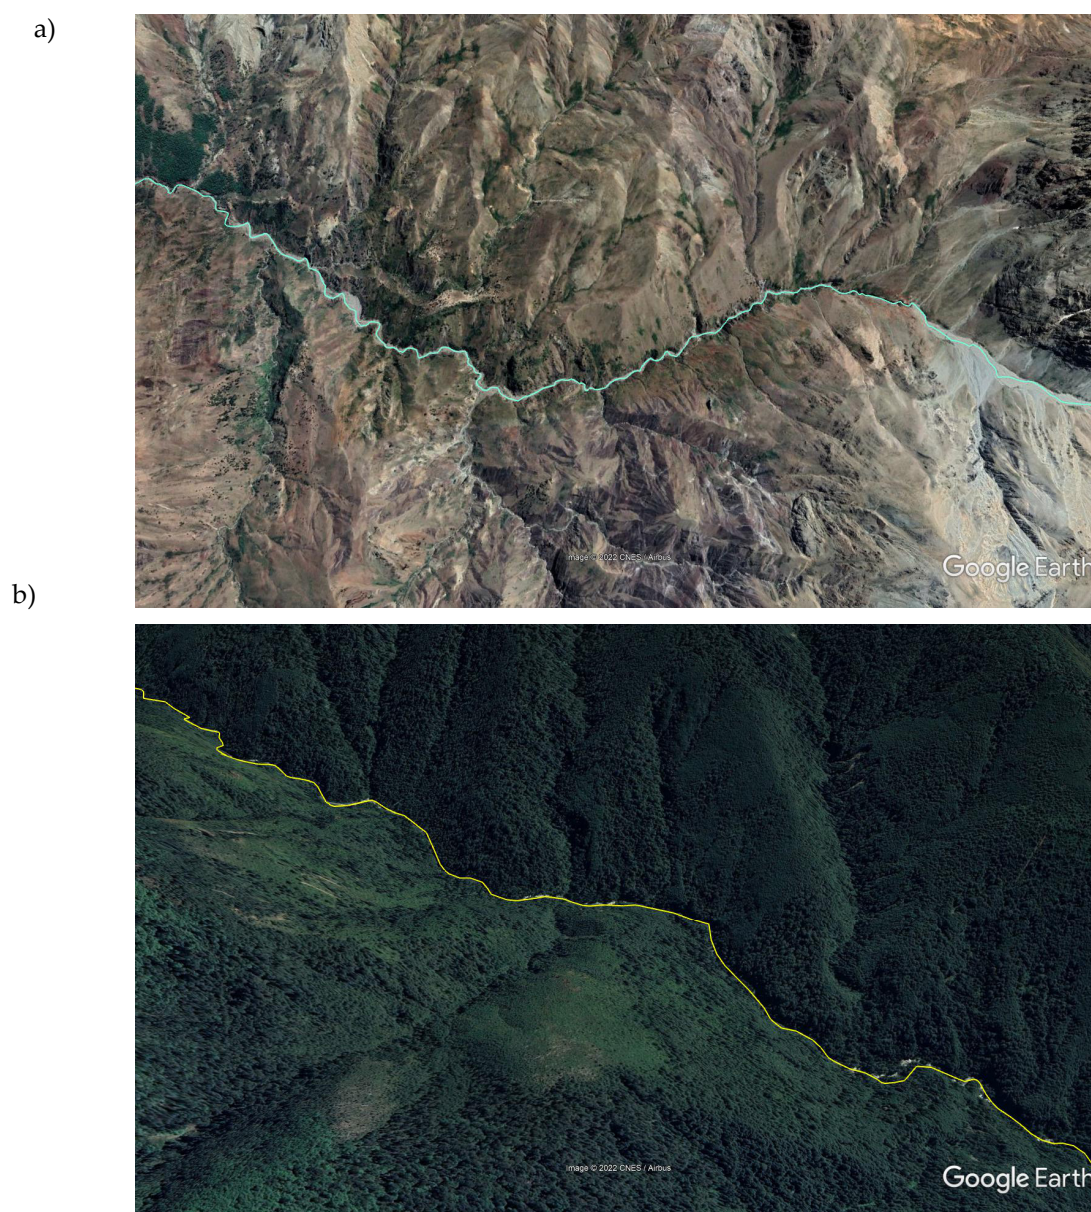

**Figure S2.** Examples of high downstream river slope FPZs. a) AHA from the Mataquito River basin; b) ASDS from the Puelo River basin. Google Earth images year 2020.



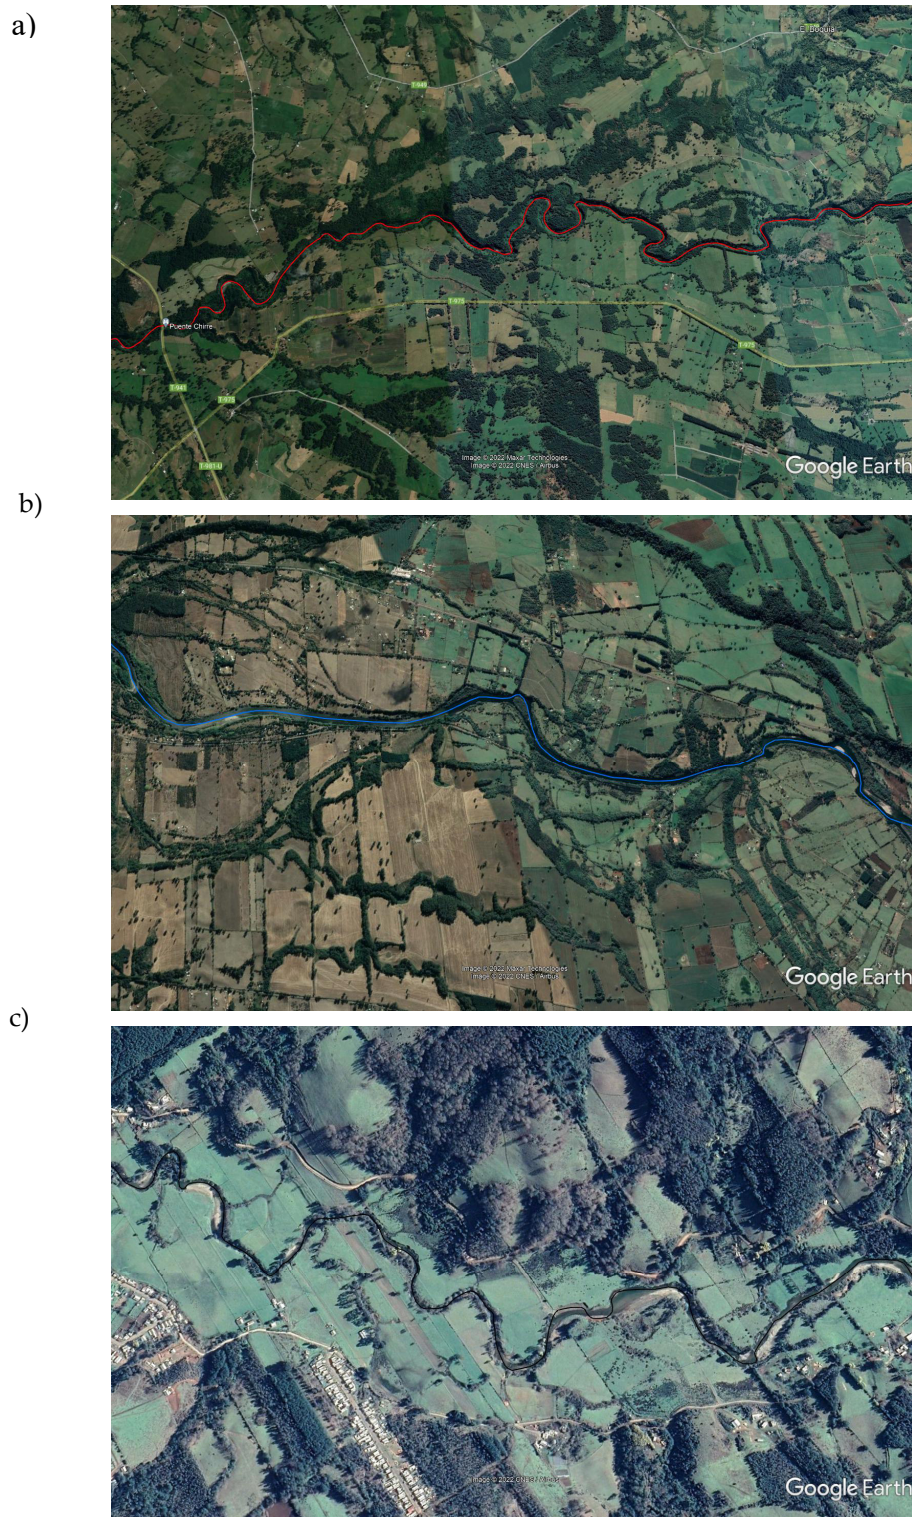

**Figure S3.** Examples of sinuous rivers FPZs. a) SSC from the Bueno River basin; b) SMC from the Toltén River basin; c) SMR from the Imperial River basin. Google Earth images year 2020.



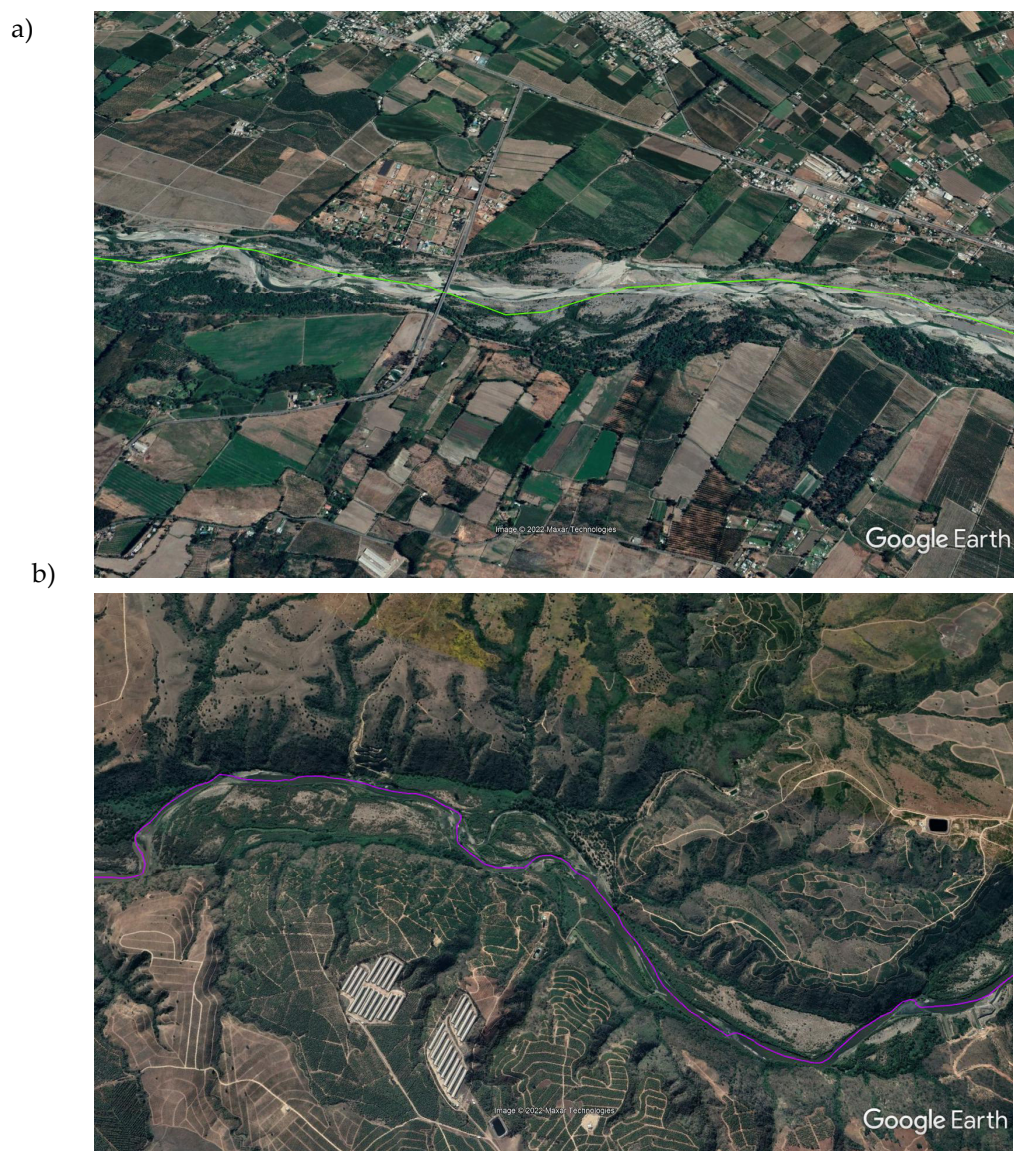

**Figure S4.** Examples of braided FPZs. a) BGDS from the Rapel River basin; b) BIR from the Maipo River basin. Google Earth images year 2020.

**Table S1.** Number of river sections (NRS) clustered in 8 FPZs and average of each geomorphic variable used for the cluster analysis. Dominant geology and channel planform are shown in Figure S1. Mean elevation and mean annual precipitation by FPZ are included for descriptions. FPZ 8 represents lakes and reservoirs. (See Table 1 for abbreviations; RVS and LVS are replaced by VSmax: maximum valley slope and VSmin: minimum valley slope).

| Hydrogeomorphic variables | Riverine FPZs |           |          |          |          |           |          | Lake FPZ |
|---------------------------|---------------|-----------|----------|----------|----------|-----------|----------|----------|
|                           | 1<br>AHA      | 2<br>ASDS | 3<br>SSC | 4<br>SMC | 5<br>SMR | 6<br>BGDS | 7<br>BIR | 8        |
| NRS                       | 1203          | 391       | 2235     | 3110     | 358      | 1225      | 98       | 189      |
| ELE                       | 1137.50       | 463.50    | 325.82   | 463.50   | 159.22   | 482.97    | 559.46   | 417.47   |
| PRE                       | 80.59         | 124.21    | 121.35   | 124.20   | 113.77   | 89.18     | 99.55    | 141.25   |
| DVS                       | 7.67          | 12.44     | 4.02     | 4.02     | 4.40     | 2.89      | 5.84     | 1.45     |
| VFW                       | 171.09        | 380.54    | 466.52   | 498.30   | 366.56   | 796.44    | 695.89   | 2882.90  |
| VW                        | 2075.00       | 2477.40   | 2281.20  | 2261.30  | 2326.40  | 2600.60   | 2897.70  | 5885.60  |
| RAT                       | 17.13         | 12.98     | 8.32     | 8.31     | 12.67    | 6.71      | 9.12     | 3.27     |
| CBW                       | 24.36         | 21.41     | 39.14    | 43.44    | 66.92    | 192.32    | 161.45   | 2601.70  |
| RCS                       | 1.21          | 1.26      | 1.31     | 1.30     | 1.39     | 1.17      | 1.21     | 1.06     |
| CBS                       | 2.03          | 2.03      | 2.04     | 2.05     | 2.05     | 2.10      | 2.05     | 2.92     |
| CBL                       | 2243.40       | 2188.80   | 2252.70  | 2281.30  | 2312.60  | 2363.50   | 2296.10  | 3358.90  |
| CO                        | 0.47          | 0.50      | 0.38     | 0.32     | 0.51     | 0.43      | 0.39     | 0.89     |
| NC                        | 1.92          | 1.00      | 1.00     | 2.00     | 1.49     | 3.61      | 3.78     | 1.01     |
| VSmax                     | 23.65         | 19.83     | 9.43     | 10.24    | 14.95    | 9.68      | 16.41    | 7.74     |
| VSmin                     | 19.35         | 15.30     | 6.45     | 7.30     | 11.89    | 6.36      | 12.03    | 4.06     |

**Table S2.** Pairwise comparisons among the seven riverine FPZs based on the geomorphic characteristics.

| Groups              | t      | P(perm) | Unique permutations |
|---------------------|--------|---------|---------------------|
| 1 (AHA) – 5 (SMR)   | 28.478 | 0.001   | 998                 |
| 1 (AHA) – 3 (SSC)   | 49.759 | 0.001   | 998                 |
| 1 (AHA) – 2 (ASDS)  | 34.795 | 0.001   | 997                 |
| 1 (AHA) – 4 (SMC)   | 47.455 | 0.001   | 998                 |
| 1 (AHA) – 6 (BGDS)  | 52.885 | 0.001   | 997                 |
| 1 (AHA) – 7 (BIR)   | 22.847 | 0.001   | 999                 |
| 5 (SMR) – 3 (SSC)   | 20.705 | 0.001   | 999                 |
| 5 (SMR) – 2 (ASDS)  | 13.513 | 0.001   | 999                 |
| 5 (SMR) – 4 (SMC)   | 21.073 | 0.001   | 999                 |
| 5 (SMR) – 6 (BGDS)  | 31.293 | 0.001   | 998                 |
| 5 (SMR) – 7 (BIR)   | 14.079 | 0.001   | 999                 |
| 3 (SSC) – 2 (ASDS)  | 28.482 | 0.001   | 998                 |
| 3 (SSC) – 4 (SMC)   | 38.651 | 0.001   | 998                 |
| 3 (SSC) – 6 (BGDS)  | 49.700 | 0.001   | 999                 |
| 3 (SSC) – 7 (BIR)   | 23.460 | 0.001   | 999                 |
| 2 (ASDS) – 4 (SMC)  | 33.809 | 0.001   | 999                 |
| 2 (ASDS) – 6 (BGDS) | 44.506 | 0.001   | 999                 |
| 2 (ASDS) – 7 (BIR)  | 14.284 | 0.001   | 999                 |
| 4 (SMC) – 6 (BGDS)  | 35.840 | 0.001   | 997                 |
| 4 (SMC) – 7 (BIR)   | 16.505 | 0.001   | 999                 |
| 4 (BGDS) – 7 (BIR)  | 13.331 | 0.001   | 998                 |

**Author Contributions** Conceptualization, E.H. and K.G.; methodology, E.H., A.Z., G.D., A.M., P.A., O.L. and K.G.; software, A.Z.; validation, E.H., A.Z., P.A., O.L. and K.G.; formal analysis, E.H., A.Z., K.G.; investigation, E.H., A.Z., G.D., A.M., P.A., O.L. and K.G.; resources, E.H., K.G. and O.L.; writing—original draft preparation, E.H. and K.G.; writing—review and editing, E.H., A.Z., G.D., A.M., P.A., O.L. and K.G.; funding acquisition, E.H. All authors have read and agreed to the published version of the manuscript.”

**Funding:** This research was funded by FONDECYT 1190647 and the APC was funded by FONDECYT 1190647.

**Data Availability Statement:** Not applicable.

**Acknowledgments:** We acknowledge Rocío Bocaletti, Paulina Vega, Katherine Arias, Macarena Ramírez, Valentina Rivas, and Rocío Pedreros for her help with the digitalization process.

**Conflicts of Interest:** The authors declare no conflict of interest.
